# Supplementary material
Source: publisher figshare collection journal article supplement (https://future-science-group.figshare.com/ndownloader/files/31644233)
Supplement: Supplementary file 1 [file 31644233]

**Supplementary Table 1. Baseline characteristics of all participants in the trial.**

Data are presented as Mean + SD.

|  | All-participants group  (n = 43) | Conformant-batch group  (n = 11) |
| --- | --- | --- |
| Age (years) | 61.3 + 10.6 | 64.8 + 11.39 |
| Gender (Male / Female) (%) | 29 (67.4) / 14 (32.6) | 7 (63.6) / 4 (36.4) |
| Body weight (kg) | 95.67 + 12.86 | 93.09 + 12.89 |
| BMI (kg/m2) | 31.29 + 3.28 | 31.64 + 4.03 |
| HbA1c (mmol/mol) | 44.5 + 3.86 | 46.1 + 3.36 |
